# Supplementary material
Source: PubMed Central journal article supplement (PMC3158698)

## SUPPLEMENTARY DATA

FIG. S1. Relative water content in buds at different developmental stages (described in Table 1 in the main text). The bar in the top right depicts the maximum l.s.d

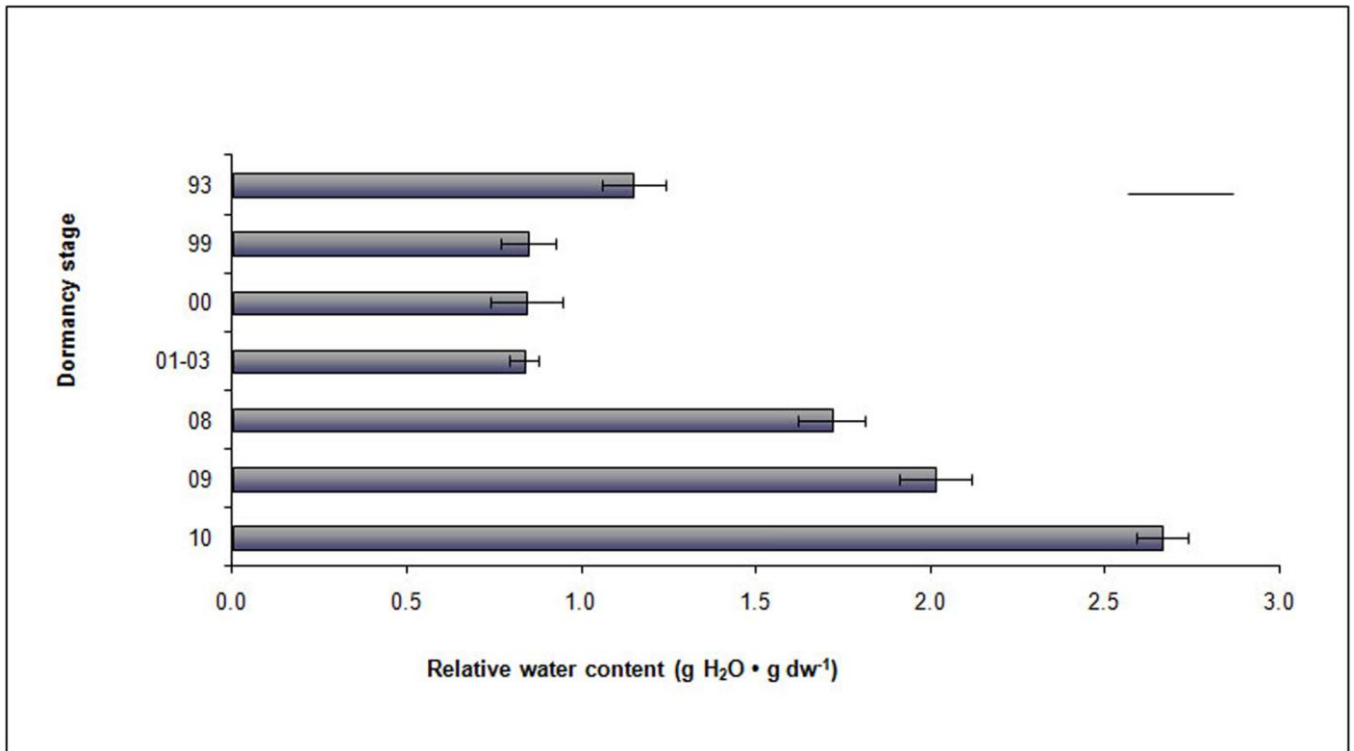

Supplement: supp_mcr185_mcr185supp_fig1.pdf [file supp_mcr185_mcr185supp_fig1.pdf]
