# Supplementary material
Source: PubMed Central journal article supplement (PMC3158698)
Supplement: supp_mcr185_mcr185supp_table1.pdf [file supp_mcr185_mcr185supp_table1.pdf]

## SUPPLEMENTARY DATA

TABLE S1. EST numbers per functional group in the D and ND libraries.

| ESTs in D library | ESTs in ND library | Description (functional group no.)                                  |
|-------------------|--------------------|---------------------------------------------------------------------|
| 57                | 31                 | Unclassified proteins (99)                                          |
| 1                 | 0                  | Tissue differentiation (45)                                         |
| 1                 | 0                  | Cell type differentiation (43)                                      |
| 1                 | 0                  | Cellular communication / signal transduction (30)                   |
| 2                 | 1                  | Cell fate (40)                                                      |
| 1                 | 2                  | Regulation of metabolism and protein function (18)                  |
| 3                 | 4                  | Epigenetic modifications                                            |
| 7                 | 6                  | Development (41)                                                    |
| 11                | 12                 | Subcellular localization (70)                                       |
| 16                | 12                 | Transcription (11)                                                  |
| 18                | 21                 | Protein fate (14)                                                   |
| 22                | 27                 | Cellular transport , transport facilities and transport routes (20) |
| 28                | 39                 | Metabolism (1)                                                      |
| 3                 | 0                  | Chitinases                                                          |
| 7                 | 3                  | Systemic interaction with the environment (36)                      |
| 14                | 8                  | Interaction with the environment (34)                               |
| 15                | 8                  | Cell rescue, defense and virulence (32)                             |
| 27                | 3                  | Dehydrin/lea/em/hsp                                                 |
| 4                 | 6                  | Cell cycle and dna processing (10)                                  |
| 3                 | 13                 | Biogenesis of cellular components (42)                              |
| 8                 | 17                 | Protein synthesis (12)                                              |
| 9                 | 20                 | Protein with binding function or cofactor requirement (16)          |
| 0                 | 21                 | Energy (2)                                                          |
| 258               | 254                | Total                                                               |
