# Supplementary material
Source: PubMed Central journal article supplement (PMC3158698)
Supplement: supp_mcr185_mcr185supp_table4.pdf [file supp_mcr185_mcr185supp_table4.pdf]

## SUPPLEMENTARY DATA

TABLE S4. A summary of gene expression in various *C. sativa* tissues.

| Development stage | <i>CsHUB2</i> | <i>CsGCN5L</i> | <i>CsGOLS</i> | <i>CsRADSAM</i> | <i>CsSAMS</i> | <i>CsHSPTF</i> | <i>CsHSPTF90</i> | <i>CsAUR3</i> |
|-------------------|---------------|----------------|---------------|-----------------|---------------|----------------|------------------|---------------|
| B93               | 0.866         | 0.474          | 0.318         | 4.627           | 21.531        | 0.88           | 6.438            | 0.228         |
| B99               | 1.972         | 1.267          | 0.683         | 2.271           | 42.616        | 1.666          | 1.769            | 0.348         |
| B00               | 1             | 1              | 1             | 1               | 1             | 1              | 1                | 1             |
| B01               | 0.281         | 0.299          | 0.819         | 1.474           | 59.645        | 2.921          | 1.315            | 0.768         |
| B08               | 0.078         | 0.114          | 0.223         | 5.843           | 3.793         | 1.408          | 10.033           | 1.087         |
| B09-10            | 0.06          | 0.219          | 0.168         | 4.605           | 0.189         | 6.084          | 3.053            | 1.396         |
| L11-12            | 0.02          | 0.103          | 0.078         | 5.644           | 0.671         | 2.523          | 2.895            | 2.104         |
| L93               | 0.126         | 0.351          | 0.068         | 4.516           | 0.067         | 0.045          | 0.306            | 0.39          |
| L95a              | 0.114         | 0.445          | 0.101         | 3.387           | 1.036         | 0.105          | 0.983            | 0.362         |
| L95b              | 0.428         | 0.851          | 0.473         | 1.338           | 1.147         | 0.13           | 2.075            | 0.529         |
| S                 | 0.181         | 0.487          | 0.359         | 1.84            | 166.4         | 5.509          | 0.61             | 0.773         |
| R                 | 0.246         | 1.461          | 0.321         | 1.619           | 1575.6        | 3.758          | 3.279            | 1.868         |
